# Supplementary material for: Physics-informed modeling of persistent predictive penalty from vocal affect in markets
Source: Research Square preprint supplement (doi:10.21203/rs.3.rs-7655247/v1), 2025-09-25
Supplement: Supplementary file 1 [file 16f685e751503aa487a2e7a2.pdf]

# Supplementary Information

*Physics-informed modeling of persistent predictive penalty from vocal affect in markets*

immediate

September 18, 2025

# Contents

|          |                                                                               |           |
|----------|-------------------------------------------------------------------------------|-----------|
| <b>1</b> | <b>Main Experimental Results and Statistical Validation</b>                   | <b>6</b>  |
| 1.1      | Table S1: Absorption Metric Calculation . . . . .                             | 6         |
| 1.2      | Table S2: Model Performance Summary (10-Day Horizon) . . . . .                | 6         |
| 1.3      | Table S3 & S4: Multi-Horizon Performance (Volatility vs. Returns) . . . . .   | 6         |
| 1.4      | Table S5 & S6: Formal Statistical Tests . . . . .                             | 7         |
| 1.5      | Table S7, S8 & S9: Sensitivity Analysis of Acoustic Feature Engineering . . . | 9         |
| 1.6      | Table S10: Testing an Alternative Mechanism (Emotional Masking) . . . . .     | 11        |
| <b>2</b> | <b>Extended Experiments and Causal Probes</b>                                 | <b>12</b> |
| 2.1      | Table S11, S12 & S13: Controlling for Confounders and Probing Causality .     | 12        |
| 2.2      | Table S14 & S15: Isolating the Acoustic Signal and Its Economic Magnitude     | 13        |
| <b>3</b> | <b>Descriptive Statistics Figures</b>                                         | <b>14</b> |

## List of Tables

|     |                                                                                                                                                                                                                                                                                                                                                                                |    |
|-----|--------------------------------------------------------------------------------------------------------------------------------------------------------------------------------------------------------------------------------------------------------------------------------------------------------------------------------------------------------------------------------|----|
| S1  | Calculation of the Absorption Score. The score captures the sharp decline in predictive power from a slight gain at day 1 to a significant penalty at the 10–15 day mark. . . . .                                                                                                                                                                                              | 6  |
| S2  | Out-of-sample (OOS) performance for 10-day log realized volatility. The Multimodal model, which incorporates vocal features, shows a substantially greater predictive penalty than the Financial-Only baseline. . . . .                                                                                                                                                        | 7  |
| S3  | OOS $R^2$ for predicting log realized volatility across multiple horizons. This table details the temporal signature of the predictive penalty, which emerges after day 1, intensifies significantly by day 10, and persists thereafter. . . . .                                                                                                                               | 7  |
| S4  | OOS $R^2$ for predicting Cumulative Abnormal Returns (CAR) across multiple horizons. In stark contrast to the results for volatility, no model configuration shows a consistent predictive advantage for returns, supporting the interpretation that vocal affect conveys risk sentiment rather than fundamental information. . . . .                                          | 7  |
| S5  | Diebold-Mariano test results comparing models to the Financial-Only baseline. This test assesses the null hypothesis of equal predictive accuracy. Panel B shows that for log realized volatility, the degradation in performance from adding acoustic and textual features is statistically significant at most horizons, formally validating the predictive penalty. . . . . | 8  |
| S6  | Model Confidence Set for 10-day log RV prediction ( $\alpha = 0.05$ ). The MCS procedure identifies a set of models that are statistically superior to others. The result shows that only a subset of models is included, indicating that other configurations are statistically dominated. . . . .                                                                            | 9  |
| S7  | Combined 10-day performance and sensitivity analysis. This table consolidates key robustness checks, showing the stability of the Multimodal model’s 10-day performance against perturbations in sound segmentation (V-A-D) and feature representation (acoustic prototypes, $K^*$ ). . . . .                                                                                  | 10 |
| S8  | Sensitivity of the Multimodal model’s OOS $R^2$ to the number of acoustic prototypes ( $K$ ). Performance is remarkably stable across a wide range of $K$ values, indicating that the findings are not dependent on a specific level of clustering granularity and that the model is capturing a genuine signal. . . . .                                                       | 10 |
| S9  | Distribution of the Multimodal model’s OOS $R^2$ under random V-A-D perturbations. The tight distribution of performance metrics under perturbation demonstrates that the model’s results are robust to the specific sound segmentation methodology. . . . .                                                                                                                   | 10 |
| S10 | Correlation between the Emotional Masking Index ( $\Delta MI$ ) and future realized volatility. The consistently weak correlation, which is statistically significant across all tested horizons, suggests that emotional masking is not a primary driver of the observed market effects. . . . .                                                                              | 11 |
| S11 | Descriptive statistics for the components of the Question Difficulty Index (QDI), constructed to control for the confounding influence of analyst question complexity. . . . .                                                                                                                                                                                                 | 12 |

|     |                                                                                                                                                                                                                                                                                                                                                                                                                                                      |    |
|-----|------------------------------------------------------------------------------------------------------------------------------------------------------------------------------------------------------------------------------------------------------------------------------------------------------------------------------------------------------------------------------------------------------------------------------------------------------|----|
| S12 | Summary statistics for the sound glitch instrumental variable (IV). Glitches serve as a plausibly exogenous shock to vocal tone for preliminary causal analysis.                                                                                                                                                                                                                                                                                     | 12 |
| S13 | Two-stage least squares (2SLS) regression results. As discussed in the main text, the weak first-stage F-statistics (well below the conventional threshold of 10) indicate the glitch instrument is not strong enough to support conclusive causal claims. The results are presented for transparency. . . . .                                                                                                                                       | 13 |
| S14 | Incremental OOS $R^2$ from adding acoustic features to a Financials+Text baseline. This addresses the alternative explanation that vocal cues are merely a proxy for textual sentiment. The persistence of the "uncertainty absorption" pattern demonstrates that the vocal channel carries a distinct signal related to transient market risk, a key conclusion of our study. Calculated from Table S3 as (Multimodal - Financial+Textual). . . . . | 13 |
| S15 | Economic magnitude of a one standard deviation decrease in vocal features on 10-day realized volatility. This analysis translates statistical coefficients into economically interpretable units. While these effects quantify a tangible link between vocal tone and market risk, their magnitude is not sufficient to support a profitable trading strategy, underscoring the theoretical nature of our contribution. . . . .                      | 14 |

## List of Figures

|    |                                                                                                                                                                                                       |    |
|----|-------------------------------------------------------------------------------------------------------------------------------------------------------------------------------------------------------|----|
| S1 | Distribution of acoustic segment length in seconds. The high frequency of short utterances reflects the conversational turn-taking that is characteristic of the Q&A sessions. . . . .                | 15 |
| S2 | Top 20 most relevant terms from a earnings call transcripts, ranked by TF-IDF scores. This analysis highlights key topics of discussion such as “quarter”, “growth”, and “margin”. . . . .            | 16 |
| S3 | Distribution of the number of acoustic segments per earnings call. The plot shows significant variation in the conversational density and length across the calls in our sample. . . . .              | 17 |
| S4 | Word cloud of the most frequent terms in the earnings call transcripts. This visualization provides a qualitative summary of the common financial and business terminology used in the calls. . . . . | 18 |

# 1 Main Experimental Results and Statistical Validation

This section provides the detailed empirical evidence supporting the core findings presented in the main text. The following tables offer a granular view of the out-of-sample forecasting performance that underpins the central discovery of a "predictive penalty" associated with vocal affect. We first detail the calculation of our preregistered "uncertainty absorption" metric, followed by multi-horizon performance tables that document the penalty's surprising temporal dynamics. Finally, we present formal statistical tests that validate the significance of these findings.

## 1.1 Table S1: Absorption Metric Calculation

This table details the components of the primary absorption metric, **Absorb**, a preregistered measure central to testing the paper's "uncertainty-absorption" hypothesis. The metric is designed to quantify the temporal dynamics of vocal affect's predictive power by capturing the degradation of predictive accuracy at intermediate horizons (10–15 days) relative to the short-term (1-day) baseline. The values are calculated as the difference in OOS  $R^2$  between the Multimodal and the **Financial-Only** models, based on data from Table S3.

**Supplementary Table S1:** Calculation of the Absorption Score. The score captures the sharp decline in predictive power from a slight gain at day 1 to a significant penalty at the 10–15 day mark.

| Metric Component                                     | Value             |
|------------------------------------------------------|-------------------|
| $\Delta R^2$ at 1-day horizon ( $\Delta R_1^2$ )     | 0.003 625         |
| $\Delta R^2$ at 10-day horizon ( $\Delta R_{10}^2$ ) | −0.092 255        |
| $\Delta R^2$ at 15-day horizon ( $\Delta R_{15}^2$ ) | −0.091 962        |
| <b>Absorption Score (<i>Absorb</i>)</b>              | <b>−0.095 734</b> |

## 1.2 Table S2: Model Performance Summary (10-Day Horizon)

This table presents key out-of-sample (OOS) performance metrics for the 10-day volatility forecasting horizon. This horizon is particularly relevant as it represents the approximate nadir of the predictive penalty documented in the main paper's Figure 2d. The table compares the full Multimodal model against various baselines and feature-set ablations. A negative OOS  $R^2$  indicates that a model underperforms a simple historical mean forecast, quantitatively defining the "predictive penalty" that is central to our findings.

## 1.3 Table S3 & S4: Multi-Horizon Performance (Volatility vs. Returns)

The following two tables provide the empirical backbone for a central argument in the paper: vocal affect signals transient, sentiment-driven market risk, not durable information about

**Supplementary Table S2:** Out-of-sample (OOS) performance for 10-day log realized volatility. The Multimodal model, which incorporates vocal features, shows a substantially greater predictive penalty than the Financial-Only baseline.

| Model Configuration             | OOS $R^2$ (log RV, 10d) | 95% CI (lower) | 95% CI (upper) | OOS MSE (log RV, 10d) | OOS QLIKE (RV, 10d) |
|---------------------------------|-------------------------|----------------|----------------|-----------------------|---------------------|
| Financial-Only                  | 0.006 413               | −0.059 574     | 0.068 039      | 1.390 651             | 0.717 551           |
| Financial+Textual               | −0.070 656              | −0.125 448     | −0.019 715     | 1.498 520             | 0.820 065           |
| Textual-Only                    | −0.115 499              | −0.157 042     | −0.083 979     | 1.561 283             | 0.881 203           |
| Acoustic-Only                   | −0.116 434              | −0.158 968     | −0.087 306     | 1.562 592             | 0.889 370           |
| Acoustic $\Delta$ (Q&A – Pres.) | −0.118 504              | −0.161 188     | −0.087 554     | 1.565 488             | 0.900 588           |
| Multimodal                      | −0.085 842              | −0.136 395     | −0.039 808     | 1.519 774             | 0.831 670           |

fundamental value. Table S3 documents the full temporal profile of the predictive penalty for volatility, providing the underlying data for Figure 2d in the main text. Table S4 provides the critical counterpart for cumulative abnormal returns (CAR), showing that the same features that degrade volatility forecasts offer no consistent predictive advantage for returns.

**Supplementary Table S3:** OOS  $R^2$  for predicting log realized volatility across multiple horizons. This table details the temporal signature of the predictive penalty, which emerges after day 1, intensifies significantly by day 10, and persists thereafter.

| Model Configuration             | OOS $R^2$ (1d) | OOS $R^2$ (5d) | OOS $R^2$ (10d) | OOS $R^2$ (15d) | OOS $R^2$ (20d) | OOS $R^2$ (25d) | OOS $R^2$ (30d) |
|---------------------------------|----------------|----------------|-----------------|-----------------|-----------------|-----------------|-----------------|
| Financial-Only                  | −0.156 768     | −0.008 270     | 0.006 413       | 0.044 900       | 0.079 158       | 0.117 031       | 0.103 273       |
| Financial+Textual               | −0.144 732     | −0.051 977     | −0.070 656      | −0.051 482      | −0.033 764      | −0.005 579      | 0.003 306       |
| Textual-Only                    | −0.175 152     | −0.087 566     | −0.115 499      | −0.119 406      | −0.125 143      | −0.140 953      | −0.151 874      |
| Acoustic-Only                   | −0.194 556     | −0.085 579     | −0.116 434      | −0.120 716      | −0.127 911      | −0.143 111      | −0.156 975      |
| Acoustic $\Delta$ (Q&A – Pres.) | −0.160 960     | −0.084 124     | −0.118 504      | −0.122 372      | −0.129 937      | −0.171 088      | −0.174 539      |
| Multimodal                      | −0.153 143     | −0.054 318     | −0.085 842      | −0.047 062      | −0.048 625      | −0.040 662      | −0.056 553      |

**Supplementary Table S4:** OOS  $R^2$  for predicting Cumulative Abnormal Returns (CAR) across multiple horizons. In stark contrast to the results for volatility, no model configuration shows a consistent predictive advantage for returns, supporting the interpretation that vocal affect conveys risk sentiment rather than fundamental information.

| Model Configuration             | OOS $R^2$ (1d) | OOS $R^2$ (5d) | OOS $R^2$ (10d) | OOS $R^2$ (15d) | OOS $R^2$ (20d) | OOS $R^2$ (25d) | OOS $R^2$ (30d) |
|---------------------------------|----------------|----------------|-----------------|-----------------|-----------------|-----------------|-----------------|
| Financial-Only                  | −0.124 538     | −0.072 626     | −0.071 584      | −0.141 355      | −0.099 290      | −0.163 160      | −0.162 548      |
| Multimodal                      | −0.126 301     | −0.083 520     | −0.077 033      | −0.140 092      | −0.107 133      | −0.119 120      | −0.134 142      |
| Financial+Textual               | −0.124 337     | −0.087 668     | −0.080 989      | −0.157 075      | −0.118 971      | −0.139 994      | −0.141 870      |
| Acoustic $\Delta$ (Q&A – Pres.) | −0.170 999     | −0.093 826     | −0.084 192      | −0.167 789      | −0.117 822      | −0.130 893      | −0.155 353      |
| Textual-Only                    | −0.177 586     | −0.100 352     | −0.097 670      | −0.184 237      | −0.126 989      | −0.139 241      | −0.167 051      |
| Acoustic-Only                   | −0.176 464     | −0.099 838     | −0.110 542      | −0.171 163      | −0.119 816      | −0.133 818      | −0.157 717      |

## 1.4 Table S5 & S6: Formal Statistical Tests

The following tables move beyond point estimates of OOS  $R^2$  to formally assess the statistical significance of the observed performance differences. Table S5 uses the Diebold-Mariano test for pairwise comparisons against the Financial-Only baseline, while Table S6 uses the Model Confidence Set procedure to identify a set of top-performing models.

**Supplementary Table S5:** Diebold-Mariano test results comparing models to the Financial-Only baseline. This test assesses the null hypothesis of equal predictive accuracy. Panel B shows that for log realized volatility, the degradation in performance from adding acoustic and textual features is statistically significant at most horizons, formally validating the predictive penalty.

| Target                                     | Horizon<br>(days) | Model vs.<br>baseline | Mean<br>loss diff | t-stat  | p-value | 95% CI<br>(lower) | 95% CI<br>(upper) | N    |
|--------------------------------------------|-------------------|-----------------------|-------------------|---------|---------|-------------------|-------------------|------|
| Panel A: Cumulative Abnormal Returns (CAR) |                   |                       |                   |         |         |                   |                   |      |
| CAR                                        | 1                 | Acoustic-Only         | 0.000 133         | 3.3258  | 0.0009  | 0.000 05          | 0.000 21          | 1554 |
|                                            |                   | Financial+Textual     | −0.000 001        | −0.0405 | 0.9677  | −0.000 03         | 0.000 02          | 1554 |
|                                            |                   | Multimodal            | 0.000 005         | 0.3037  | 0.7614  | −0.000 02         | 0.000 03          | 1554 |
|                                            |                   | Textual-Only          | 0.000 136         | 3.4034  | 0.0007  | 0.000 06          | 0.000 21          | 1554 |
|                                            | 5                 | Acoustic-Only         | 0.000 160         | 2.3332  | 0.0198  | 0.000 03          | 0.000 29          | 1554 |
|                                            |                   | Financial+Textual     | 0.000 088         | 1.9290  | 0.0539  | 0.000 00          | 0.000 18          | 1554 |
|                                            |                   | Multimodal            | 0.000 064         | 1.1730  | 0.2410  | −0.000 04         | 0.000 17          | 1554 |
|                                            |                   | Textual-Only          | 0.000 163         | 2.2649  | 0.0237  | 0.000 02          | 0.000 30          | 1554 |
|                                            | 10                | Acoustic-Only         | 0.000 291         | 2.9108  | 0.0037  | 0.000 09          | 0.000 49          | 1554 |
|                                            |                   | Financial+Textual     | 0.000 070         | 1.0307  | 0.3028  | −0.000 06         | 0.000 20          | 1554 |
|                                            |                   | Multimodal            | 0.000 041         | 0.5980  | 0.5499  | −0.000 09         | 0.000 17          | 1554 |
|                                            |                   | Textual-Only          | 0.000 195         | 2.1563  | 0.0312  | 0.000 02          | 0.000 37          | 1554 |
|                                            | 20                | Acoustic-Only         | 0.000 226         | 1.8776  | 0.0606  | −0.000 01         | 0.000 46          | 1554 |
|                                            |                   | Financial+Textual     | 0.000 217         | 2.4288  | 0.0153  | 0.000 04          | 0.000 39          | 1554 |
|                                            |                   | Multimodal            | 0.000 086         | 0.9721  | 0.3312  | −0.000 09         | 0.000 26          | 1554 |
|                                            |                   | Textual-Only          | 0.000 305         | 2.3415  | 0.0193  | 0.000 05          | 0.000 56          | 1554 |
|                                            | 30                | Acoustic-Only         | −0.000 072        | −0.2397 | 0.8106  | −0.000 66         | 0.000 52          | 1554 |
|                                            |                   | Financial+Textual     | −0.000 309        | −1.5909 | 0.1118  | −0.000 69         | 0.000 07          | 1554 |
|                                            |                   | Multimodal            | −0.000 425        | −2.1904 | 0.0286  | −0.000 81         | −0.000 04         | 1554 |
|                                            |                   | Textual-Only          | 0.000 067         | 0.2060  | 0.8368  | −0.000 57         | 0.000 71          | 1554 |
| Panel B: Log Realized Volatility (log_RV)  |                   |                       |                   |         |         |                   |                   |      |
| log_RV                                     | 1                 | Acoustic-Only         | 0.260 152         | 3.6870  | 0.0002  | 0.121 75          | 0.398 55          | 1554 |
|                                            |                   | Financial+Textual     | −0.082 868        | −1.7048 | 0.0884  | −0.178 22         | 0.012 48          | 1554 |
|                                            |                   | Multimodal            | −0.024 962        | −0.5498 | 0.5826  | −0.114 02         | 0.064 10          | 1554 |
|                                            |                   | Textual-Only          | 0.126 563         | 2.5787  | 0.0100  | 0.030 29          | 0.222 84          | 1554 |
|                                            | 5                 | Acoustic-Only         | 0.164 154         | 3.4230  | 0.0006  | 0.070 09          | 0.258 22          | 1554 |
|                                            |                   | Financial+Textual     | 0.092 807         | 3.0919  | 0.0020  | 0.033 93          | 0.151 68          | 1554 |
|                                            |                   | Multimodal            | 0.097 776         | 3.1445  | 0.0017  | 0.036 78          | 0.158 77          | 1554 |
|                                            |                   | Textual-Only          | 0.168 373         | 3.5037  | 0.0005  | 0.074 11          | 0.262 63          | 1554 |
|                                            | 10                | Acoustic-Only         | 0.171 940         | 3.3385  | 0.0009  | 0.070 92          | 0.272 96          | 1554 |
|                                            |                   | Financial+Textual     | 0.107 869         | 4.1011  | 0.0000  | 0.056 28          | 0.159 46          | 1554 |
|                                            |                   | Multimodal            | 0.129 123         | 4.0949  | 0.0000  | 0.067 27          | 0.190 97          | 1554 |
|                                            |                   | Textual-Only          | 0.170 632         | 3.2191  | 0.0013  | 0.066 66          | 0.274 60          | 1554 |
|                                            |                   | Acoustic-Only         | 0.228 422         | 4.4394  | 0.0000  | 0.127 50          | 0.329 35          | 1554 |

Supplementary Table S5 – continued from previous page

| Target | Horizon<br>(days) | Model vs.<br>Financial-<br>Only | Mean<br>loss diff | t-stat | p-value | 95% CI<br>(lower) | 95% CI<br>(upper) | N    |
|--------|-------------------|---------------------------------|-------------------|--------|---------|-------------------|-------------------|------|
|        |                   | Financial+Textual               | 0.124 567         | 4.7411 | 0.0000  | 0.073 03          | 0.176 10          | 1554 |
|        |                   | Multimodal                      | 0.140 960         | 4.3157 | 0.0000  | 0.076 89          | 0.205 03          | 1554 |
|        |                   | Textual-Only                    | 0.225 368         | 4.3866 | 0.0000  | 0.124 59          | 0.326 14          | 1554 |
|        | 30                | Acoustic-Only                   | 0.236 027         | 4.3775 | 0.0000  | 0.130 27          | 0.341 79          | 1554 |
|        |                   | Financial+Textual               | 0.090 663         | 2.6880 | 0.0073  | 0.024 50          | 0.156 82          | 1554 |
|        |                   | Multimodal                      | 0.144 951         | 4.0086 | 0.0001  | 0.074 02          | 0.215 88          | 1554 |
|        |                   | Textual-Only                    | 0.231 400         | 4.3866 | 0.0000  | 0.127 93          | 0.334 87          | 1554 |

**Supplementary Table S6:** Model Confidence Set for 10-day log RV prediction ( $\alpha = 0.05$ ). The MCS procedure identifies a set of models that are statistically superior to others. The result shows that only a subset of models is included, indicating that other configurations are statistically dominated.

| Model in MCS ( $\alpha = 0.05$ )                                               |
|--------------------------------------------------------------------------------|
| Acoustic-Only , Financial+Textual , Financial-Only , Multimodal , Textual-Only |

## 1.5 Table S7, S8 & S9: Sensitivity Analysis of Acoustic Feature Engineering

A core methodological contribution of our work is the robust extraction of nuanced acoustic features using the Physics-Informed Multimodal Model (PIMM). The process of converting raw audio into meaningful quantitative signals—known as feature engineering—is pivotal, yet it often involves numerous discretionary choices that could inadvertently influence the final outcome. Therefore, to bolster the credibility of our conclusions, the following tables detail a comprehensive series of sensitivity analyses. These rigorous tests are specifically designed to ensure that our central finding—the discovery of a persistent predictive penalty linked to vocal affect—is a genuine market phenomenon and not merely an artifact of specific, arbitrary choices made within our feature engineering pipeline.

Specifically, we investigate two primary sources of potential instability. First, we test the model’s robustness against variations in sound segmentation methodology, using perturbations in Voice-Activity-Detection (V-A-D) to confirm that the way we define speech segments does not drive the results. Second, we assess the impact of the granularity of the acoustic feature representation by varying the number of acoustic prototypes ( $K$ ) used for clustering. These tests collectively confirm that our findings are remarkably stable, demonstrating that the predictive penalty is a consistent signal that holds up against different methodological configurations.

**Supplementary Table S7:** Combined 10-day performance and sensitivity analysis. This table consolidates key robustness checks, showing the stability of the Multimodal model’s 10-day performance against perturbations in sound segmentation (V-A-D) and feature representation (acoustic prototypes,  $K^*$ ).

| Model Configuration             | OOS $R^2$<br>(10d) | V-A-D $R^2$<br>(median) | V-A-D $R^2$<br>(IQR) | Prototype $K^*$ | $R^2$ @ $K^*$ |
|---------------------------------|--------------------|-------------------------|----------------------|-----------------|---------------|
| Financial-Only                  | 0.006 413          | —                       | —                    | —               | —             |
| Financial+Textual               | −0.070 656         | —                       | —                    | —               | —             |
| Textual-Only                    | −0.115 499         | —                       | —                    | —               | —             |
| Acoustic-Only                   | −0.116 434         | −0.087 418              | 0.010 864            | 16              | −0.102 554    |
| Acoustic $\Delta$ (Q&A – Pres.) | −0.118 504         | −0.087 418              | 0.010 864            | 16              | −0.102 554    |
| Multimodal                      | −0.085 842         | −0.087 418              | 0.010 864            | 16              | −0.102 554    |

**Supplementary Table S8:** Sensitivity of the Multimodal model’s OOS  $R^2$  to the number of acoustic prototypes ( $K$ ). Performance is remarkably stable across a wide range of  $K$  values, indicating that the findings are not dependent on a specific level of clustering granularity and that the model is capturing a genuine signal.

| K (Number of Prototypes) | OOS $R^2$  |
|--------------------------|------------|
| 16                       | −0.102 554 |
| 32                       | −0.110 175 |
| 64                       | −0.110 175 |
| 128                      | −0.110 175 |
| 256                      | −0.110 175 |
| 512                      | −0.108 128 |

**Supplementary Table S9:** Distribution of the Multimodal model’s OOS  $R^2$  under random V-A-D perturbations. The tight distribution of performance metrics under perturbation demonstrates that the model’s results are robust to the specific sound segmentation methodology.

| Statistic    | Value      |
|--------------|------------|
| Mean         | −0.085 596 |
| Std. Dev.    | 0.013 406  |
| Min          | −0.109 520 |
| 25% (Q1)     | −0.093 776 |
| 50% (Median) | −0.087 419 |
| 75% (Q3)     | −0.082 924 |
| Max          | −0.056 679 |

## 1.6 Table S10: Testing an Alternative Mechanism (Emotional Masking)

To explore alternative mechanisms, we investigated whether "emotional masking"—a conflict between textual and acoustic sentiment—could explain the observed market reaction. This table reports the correlation between changes in our Emotional Masking Index ( $\Delta MI$ ) and future volatility.

**Supplementary Table S10:** Correlation between the Emotional Masking Index ( $\Delta MI$ ) and future realized volatility. The consistently weak correlation, which is statistically significant across all tested horizons, suggests that emotional masking is not a primary driver of the observed market effects.

| Horizon (days) | Correlation (Corr) | CI (lower) | CI (upper) |
|----------------|--------------------|------------|------------|
| 1              | −0.115 173         | −0.158 889 | −0.067 655 |
| 5              | −0.094 045         | −0.144 617 | −0.039 326 |
| 10             | −0.088 192         | −0.147 659 | −0.029 919 |
| 15             | −0.082 008         | −0.143 943 | −0.022 311 |
| 20             | −0.077 852         | −0.141 411 | −0.018 673 |
| 25             | −0.076 044         | −0.139 668 | −0.015 786 |
| 30             | −0.077 762         | −0.141 591 | −0.017 092 |

## 2 Extended Experiments and Causal Probes

This section details extended analyses designed to probe the robustness of our findings and explore potential causal pathways. This includes controlling for a key potential confounder (Question Difficulty) and a preliminary investigation into a causal linkage using an instrumental variable (IV) approach. As noted in the main text, the IV analysis proved inconclusive due to a weak instrument, and we therefore refrain from making causal claims. These experiments correspond to outputs from the script `emovoice_extended_experiments.py`.

### 2.1 Table S11, S12 & S13: Controlling for Confounders and Probing Causality

A key challenge in this domain is isolating the effect of vocal tone from confounding variables. An analyst’s question, for example, could be complex, independently causing both a hesitant vocal response and increased market uncertainty. Tables S11–S13 detail our efforts to address this. We first construct a Question Difficulty Index (QDI) to control for this confound. We then conduct a preliminary instrumental variable (IV) analysis using technical sound glitches as a plausibly exogenous shock to vocal tone.

**Supplementary Table S11:** Descriptive statistics for the components of the Question Difficulty Index (QDI), constructed to control for the confounding influence of analyst question complexity.

| Component                       | Mean      | Std. Dev. | Min      | Max       |
|---------------------------------|-----------|-----------|----------|-----------|
| Negative Word Density           | 0.001 14  | 0.001 56  | 0.000 00 | 0.038 46  |
| Numeric Token Density           | 0.000 00  | 0.000 01  | 0.000 00 | 0.000 32  |
| Mean Question Length (words)    | 20.725 10 | 5.983 18  | 5.200 00 | 62.666 67 |
| Type-Token Ratio (TTR)          | 0.320 84  | 0.101 07  | 0.089 63 | 0.939 39  |
| Question Mark Ratio             | 0.128 70  | 0.105 56  | 0.000 00 | 1.000 00  |
| Clause Ratio (complexity proxy) | 1.279 75  | 0.435 56  | 0.000 00 | 6.000 00  |

**Supplementary Table S12:** Summary statistics for the sound glitch instrumental variable (IV). Glitches serve as a plausibly exogenous shock to vocal tone for preliminary causal analysis.

| Variable               | Mean     | Std. Dev. | Min      | Max      |
|------------------------|----------|-----------|----------|----------|
| Glitch rate (text)     | 0.001 27 | 0.002 54  | 0.000 00 | 0.039 30 |
| Any glitch (indicator) | 0.428 97 | 0.495 07  | 0.000 00 | 1.000 00 |
| Glitch bursts (count)  | 0.456 03 | 0.555 99  | 0.000 00 | 4.000 00 |
| Instrument value       | 0.001 27 | 0.002 54  | 0.000 00 | 0.039 30 |

**Supplementary Table S13:** Two-stage least squares (2SLS) regression results. As discussed in the main text, the weak first-stage F-statistics (well below the conventional threshold of 10) indicate the glitch instrument is not strong enough to support conclusive causal claims. The results are presented for transparency.

| <b>Panel A: IV Summary Statistics</b>                     |             |            |           |          |
|-----------------------------------------------------------|-------------|------------|-----------|----------|
| Observations (N)                                          | 1440        |            |           |          |
| F-stat ( $\Delta$ dominance)                              | 2.810 20    |            |           |          |
| F-stat ( $\Delta$ valence)                                | 1.496 54    |            |           |          |
| Stage-2 $R^2$                                             | 0.213 70    |            |           |          |
| Stage-2 Adj. $R^2$                                        | 0.211 51    |            |           |          |
| <b>Panel B: Stage-2 Coefficients (Target: log RV 10d)</b> |             |            |           |          |
| Variable                                                  | Coef.       | Std. Err.  | t         | p        |
| const                                                     | −3.147 20   | 2.510 60   | −1.253 57 | 0.210 00 |
| Pred. $\Delta$ dominance                                  | 247.711 54  | 177.370 62 | 1.396 58  | 0.162 54 |
| Pred. $\Delta$ valence                                    | −133.340 80 | 101.977 62 | −1.307 55 | 0.191 03 |
| Hist. Volatility                                          | 9.255 22    | 4.738 22   | 1.953 31  | 0.050 78 |
| QDI                                                       | −0.647 10   | 0.706 66   | −0.915 72 | 0.359 81 |

## 2.2 Table S14 & S15: Isolating the Acoustic Signal and Its Economic Magnitude

This section presents two final analyses. Table S14 provides a key robustness check that isolates the unique predictive information in the acoustic channel. Table S15 moves beyond statistical significance to quantify the economic magnitude of the vocal effects.

**Supplementary Table S14:** Incremental OOS  $R^2$  from adding acoustic features to a Financials+Text baseline. This addresses the alternative explanation that vocal cues are merely a proxy for textual sentiment. The persistence of the "uncertainty absorption" pattern demonstrates that the vocal channel carries a distinct signal related to transient market risk, a key conclusion of our study. Calculated from Table S3 as (Multimodal - Financial+Textual).

| Prediction Horizon (days) | Incremental $\Delta R^2$ vs. Financials+Text |
|---------------------------|----------------------------------------------|
| 1                         | −0.008 41                                    |
| 5                         | −0.002 34                                    |
| 10                        | −0.015 19                                    |
| 15                        | 0.004 42                                     |
| 20                        | −0.014 86                                    |
| 25                        | −0.035 08                                    |
| 30                        | −0.059 86                                    |

**Supplementary Table S15:** Economic magnitude of a one standard deviation decrease in vocal features on 10-day realized volatility. This analysis translates statistical coefficients into economically interpretable units. While these effects quantify a tangible link between vocal tone and market risk, their magnitude is not sufficient to support a profitable trading strategy, underscoring the theoretical nature of our contribution.

| Vocal Feature (1 SD change)   | $\Delta \log(\text{RV})$ | % Change in RV | Basis Point Change |
|-------------------------------|--------------------------|----------------|--------------------|
| ↓ in $\Delta$ Vocal Dominance | 0.024 45                 | 2.415 64       | 241.564 45         |
| ↓ in $\Delta$ Vocal Valence   | 0.045 20                 | 4.419 14       | 441.913 78         |

### 3 Descriptive Statistics Figures

This section provides figures that visualize the fundamental properties of the earnings call dataset. These visualizations offer essential context on the structure of the data, such as the length and frequency of speech segments and the most salient topics of discussion, which are key for understanding the environment in which our models operate. These figures were generated by the script `emovoice_segments_descriptive.py`.

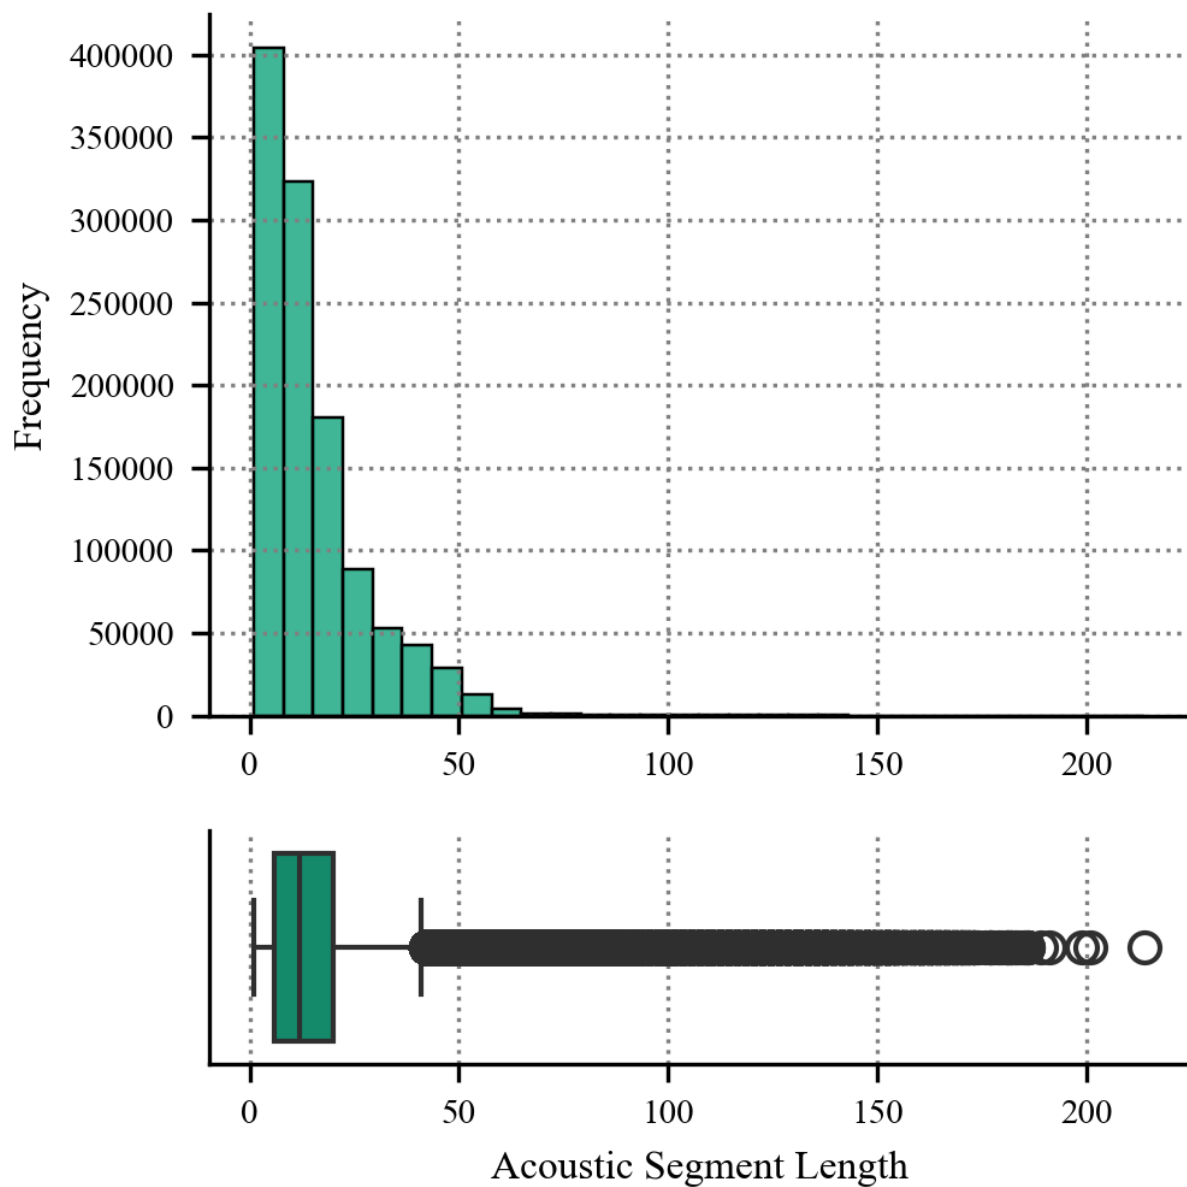

**Supplementary Figure S1:** Distribution of acoustic segment length in seconds. The high frequency of short utterances reflects the conversational turn-taking that is characteristic of the Q&A sessions.

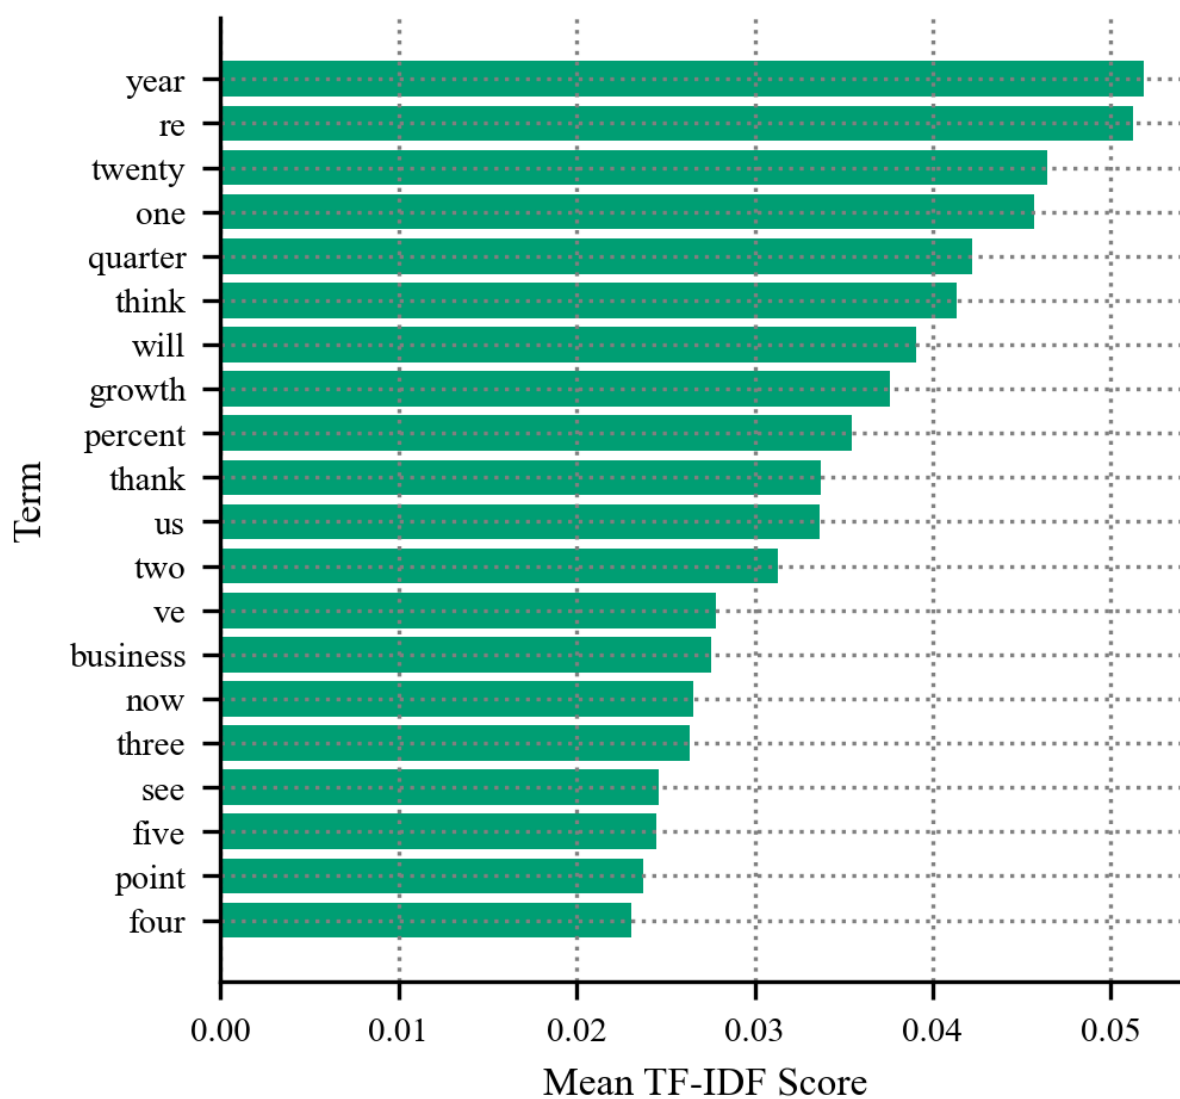

**Supplementary Figure S2:** Top 20 most relevant terms from a earnings call transcripts, ranked by TF-IDF scores. This analysis highlights key topics of discussion such as “quarter”, “growth”, and “margin”.

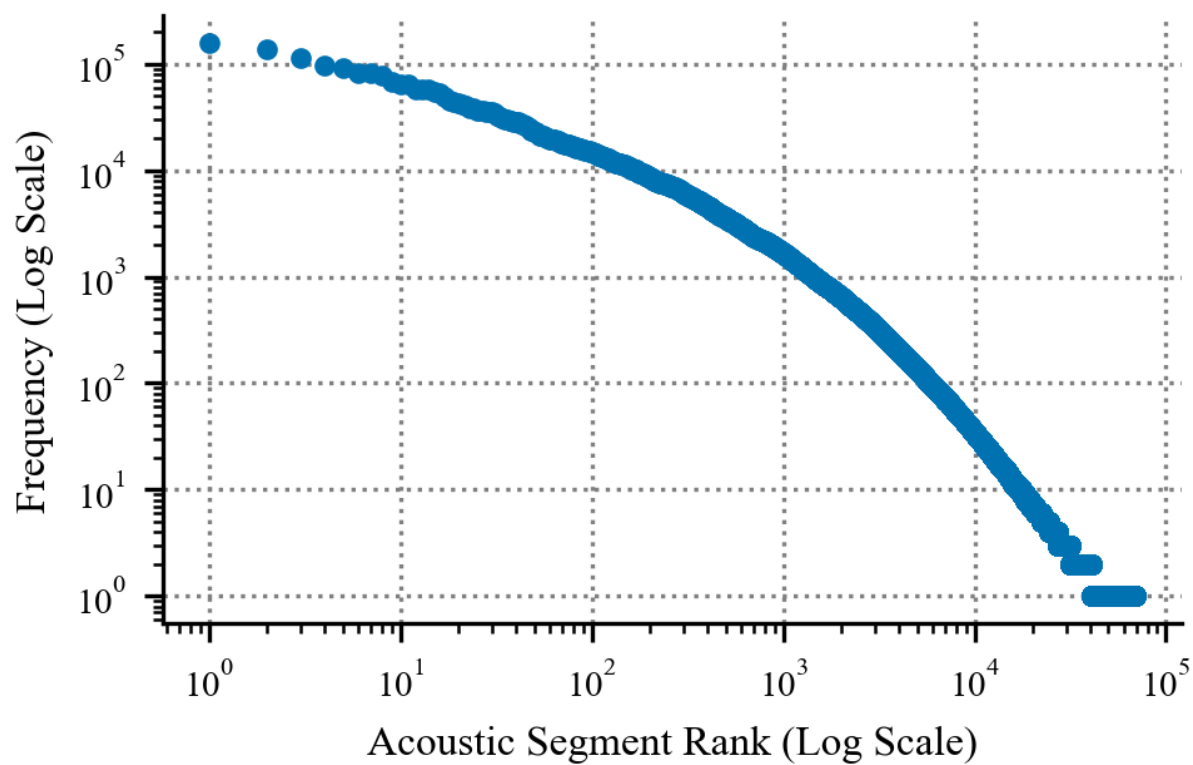

**Supplementary Figure S3:** Distribution of the number of acoustic segments per earnings call. The plot shows significant variation in the conversational density and length across the calls in our sample.
